# Supplementary material
Source: MDPI journal article supplement (https://www.mdpi.com/2073-4344/13/1/42)
Supplement: s1 [file s1]

## Supporting Information

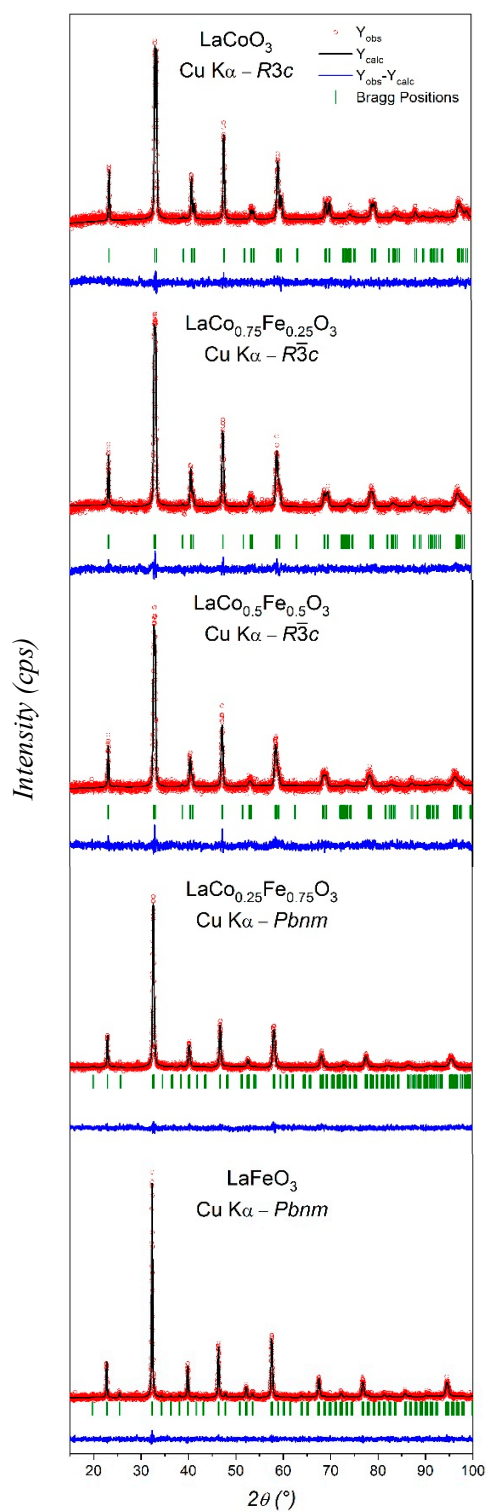

**Figure S1:** XRD patterns with Rietveld refinements.

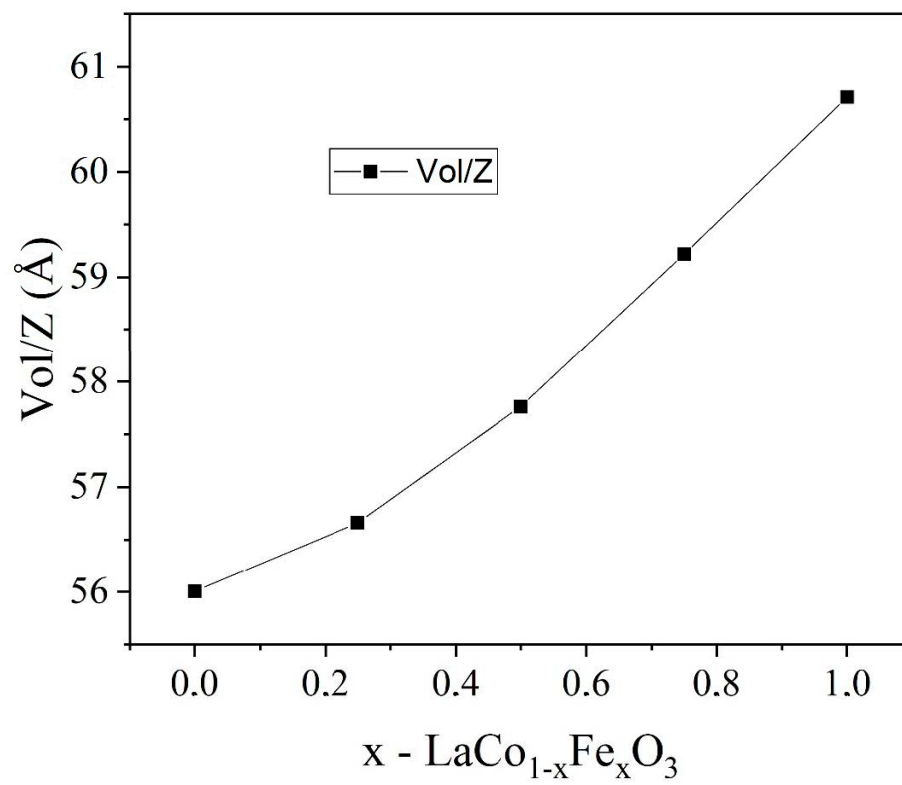

**Figure S2:** The volume normalized with Z.
